# Supplementary material
Source: ML conference proceedings conference paper supplement (https://aclanthology.org/2026.semeval-1.51)

## External Content

## Extension Content

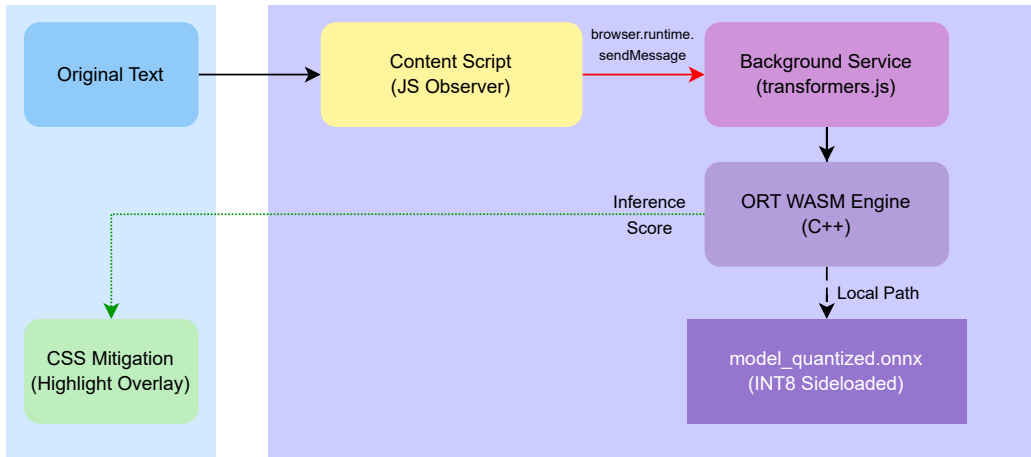

Supplement: SupplementaryMaterial [file NLP_extension_informationflow.pdf › POLAR_2026_TASK_9__system_description_paper___PEERREVIEW_WIP___Copy_-2/NLP_extension_informationflow.pdf]
